# Supplementary material
Source: PubMed Central journal article supplement (PMC7116629)
Supplement: EMS110887-supplement-Supplementary_Figure.pdf [file EMS110887-supplement-Supplementary_Figure.pdf]

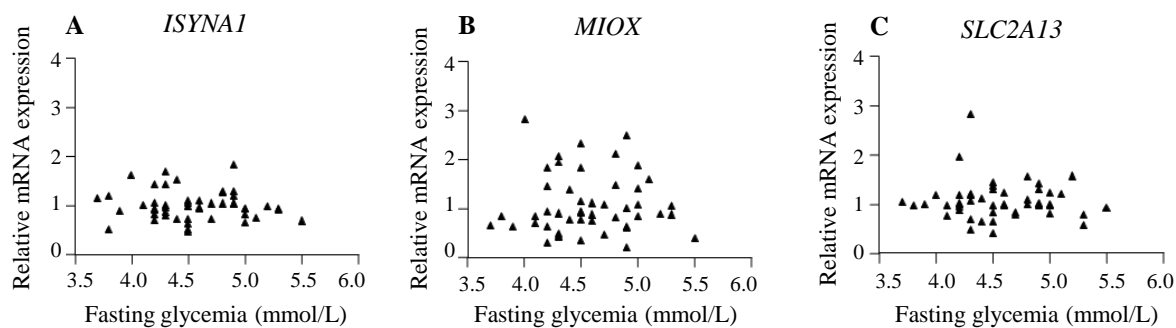

Supplementary material for paper published in Journal of Clinical Endocrinology and Metabolism entitled "Placental Inositol Reduced in Gestational Diabetes as Glucose alters Inositol Transporters and IMPA1 enzyme expression" by RA Pillai, et.al. 2020

**Supplementary figure 1: Relative mRNA expression of inositol enzymes and transporters with increasing maternal fasting glycemia.** Graphs show unadjusted data (n=50) of relative mRNA expression quantified by Taqman RT-PCR for *ISYNA1* (A), *MIOX* (B) and *SLC5A3* (C); mean mRNA expression in non-GDM placenta has been assigned a value of 1.

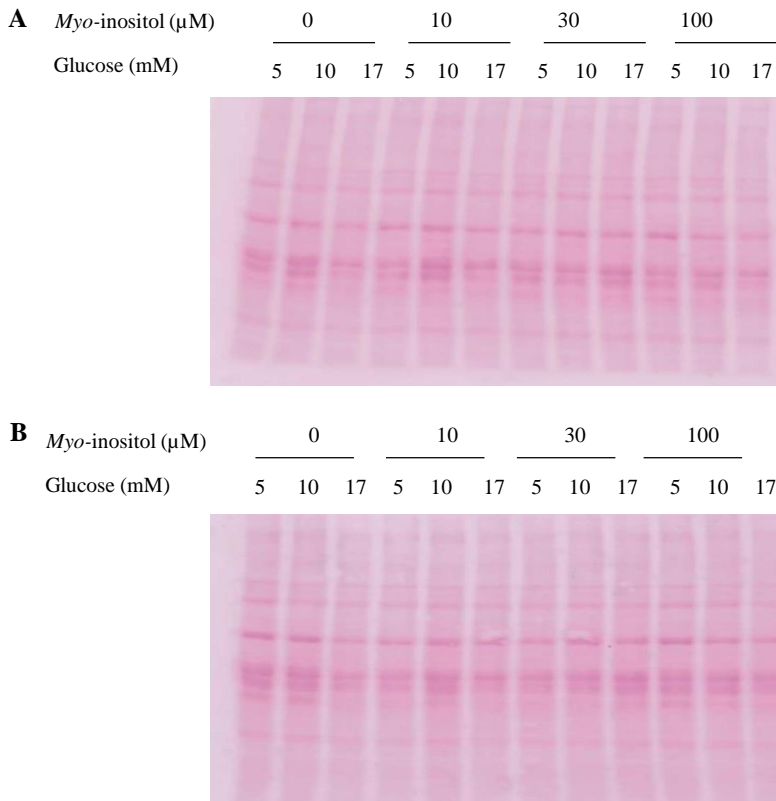

Supplementary material for paper published in Journal of Clinical Endocrinology and Metabolism entitled "Placental Inositol Reduced in Gestational Diabetes as Glucose alters Inositol Transporters and IMPA1 enzyme expression" by RA Pillai, et.al. 2020

**Supplementary figure 2: Western blot membranes demonstrating total protein loading by Ponceau S.** Representative images of Ponceau S stained western blot membranes showing total protein loading from placental explants cultured across the experimental conditions of increasing concentrations of glucose (5, 10, 17mM) and *myo*-inositol (0, 10, 30, 100 $\mu\text{M}$ ) for 48h. Representative blot used for (A) IMPA1 and SLC5A11, and (B) SLC2A13 evaluations.
